# Supplementary material for: Evolutionary insights from a rare male palm bug (Thaumastocoridae) in Cretaceous amber
Source: Research Square preprint supplement (doi:10.21203/rs.3.rs-7203518/v1), 2025-12-01
Supplement: Supplementary file 1 [file d4e81bb8fc1dfbc2e264efb7.pdf]

# **Evolutionary insights from a rare male palm bug (Thaumastocoridae) in Cretaceous amber**

Mateo D. Monferran, Leonidas-Romanos Davranoglou & Enrique Peñalver

## **SUPPLEMENTARY MATERIALS**

Supplementary Figure 1: *Popovocoris punctatus* nov. gen. et sp., holotype MGM-7911X (male)

Supplementary Appendix 1: Descriptive list of characters, taxa used in the phylogenetic analysis (all terminal taxa are species, all characters for each terminal are coded directly from species) and character matrix

Supplementary References

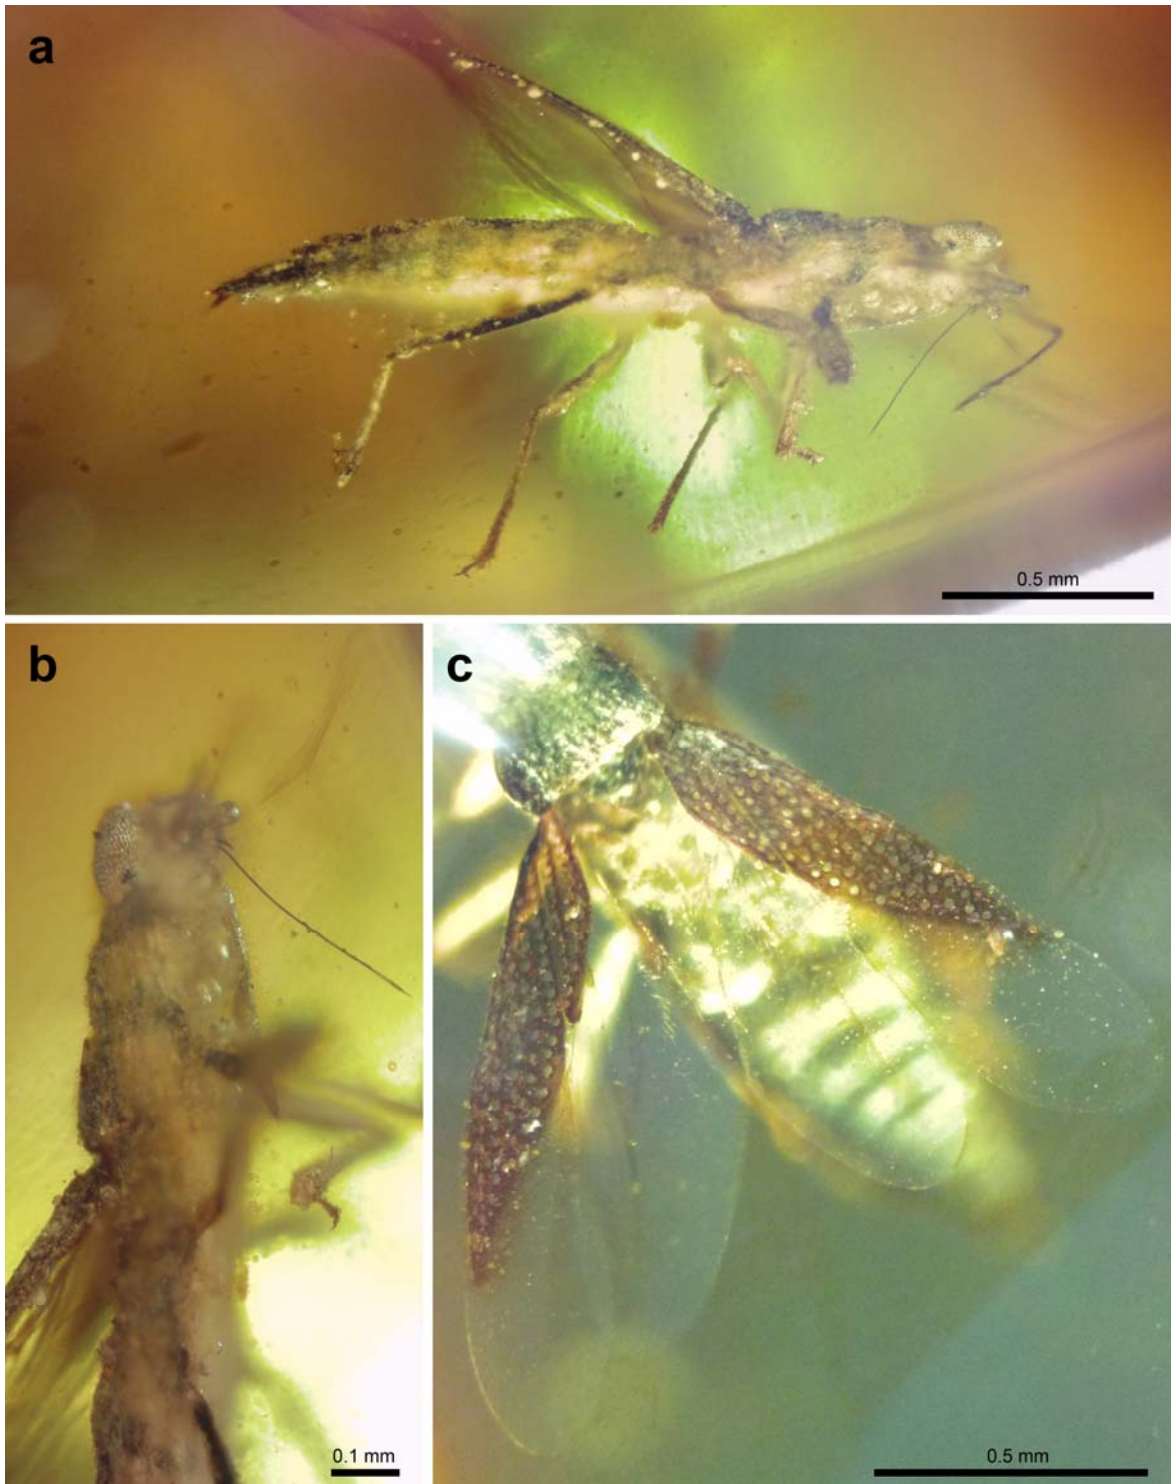

**Supplementary Figure S1.** *Popovocoris punctatus* nov. gen. et sp., holotype MGM-7911X (male). Habitus, lateral view (**a** and **b**) and dorsal view (**c**).

## Supplementary Appendix 1

**Descriptive list of characters, taxa used in the phylogenetic analysis (all terminal taxa are species, all characters for each terminal are coded directly from species) and character matrix.**

### List of characters

#### Body

[0] General outline of the body: (0) elongate, but less than 4 times as long as maximum pronotal width; (1) much longer than wide, at least 5 times as long as maximum pronotal width; (2) ovoid, scarcely longer than wide. Modified from Du *et al.*, 2016.

[1] Punctures on pronotum and scutellum: (0) unpunctured; (1) weakly punctured, diameter of punctures narrower than space between; (2) heavily punctured, diameter of punctures as wide as space between; (3) areolate, diameter of punctures distinct wider than space between. This coding is derived from Du *et al.*, 2016.

#### Head

[2] Head laterally: (0) conical or sub-conical; (1) dorso-ventrally flattened. This coding is derived from Grazia *et al.*, 2008.

[3] Mandibular plates: (0) normal size, not extending to apex of clypeus, or reduced; (1) enlarged, extending to apex of clypeus. This coding is derived from Schuh *et al.*, 2009.

[4] Length of bucculae: (0) very short or reduced, never extending to antennal insertion; (1) long, narrow, extending half-length of head or more. This coding is derived from Henry, 1997.

[5] Gular groove: (0) absent; (1) present. This coding is derived from Henry, 1997.

[6] Eyes: (0) eyes simple, not stylate; (1) eyes stylate. This coding is derived from Henry, 1997.

[7] Ocelli: (0) present; (1) absent. This coding is derived from Henry, 1997.

[8] Sutures between ocelli and compound eyes: (0) absent; (1) weakly developed; (2) strongly developed. This coding is derived from Henry, 1997.

[9] Length of labium: (0) short, not extending posteriorly to forecoxae; (1) longer, usually extending posteriorly to mesocoxae. This coding is derived from Schuh & Slater, 1995.

[10] Antennal bases: (0) base arising below level of eye, partially obscured by mandibular plates; (1) base arising above level of eye, completely visible in dorsal view. This coding is derived from Henry, 1997.

[11] Antennal pedicelar trichobothria: (0) without trichobothria; (1) one trichobothrium or more than one. This coding is derived from Schuh *et al.*, 2009

[12] Length of antennal segment I: (0) short, slightly exceeding or not attaining apex of head; (1) elongate, slender, over 3 times as long as diameter; (2) very long, slender, over 10 times as long as diameter. This coding is derived from Du *et al.*, 2016.

#### Thorax

[13] Pronotum shape: (0) trapezoidal; (1) hexagonal, semicircular or other. This coding is derived from Henry, 1997.

- [14] Pronotal carinae: (0) absent; (1) 1–5 present. This coding is derived from Cassis & Schuh, 2010.
- [15] Labial groove on mesosternum: (0) without sulcus; (1) deeply sulcate. This coding is derived from Henry, 1997.
- [16] Metathoracic scent-gland evaporator structures: (0) no evaporatorium, no peritreme; (1) peritreme only; (2) evaporatorium and peritreme. This coding is derived from Schuh *et al.*, 2009.
- [17] Briendley's gland: (0) absent; (1) present. This coding is derived from Schuh *et al.*, 2009.
- [18] Armature on scutellum: (0) absent; (1) armed with median carinae, conical or globose tubercle, or slender spine. This coding is derived from Schuh & Slater, 1995.
- [19] Corium: (0) no transparent; (1) at least in part transparent or translucent. This coding is derived from Zheng, 1995.
- [20] Processus corial: (0) absent; (1) present. This coding is a diagnostic feature of Microphysidae.
- [21] Veins on corium: (0) well developed, raised and keel-like; (1) reduced.
- [22] Costal area/embolium: (0) narrow to carinate; (1) explanate, not areolate; (2) explanate, areolate. This coding is derived from Cassis *et al.*, 2023.
- [23] Type of veins on membrane forewing: (0) normal, raised and keel-like; (1) absent- lacking veins. This coding was modified from Du *et al.*, 2016, adding stage 1 according to this new specimen.
- [24] Claval commissure: (0) well developed, distinctly longer than scutellum, close to two times of length of scutellum; (1) developed, but distinct longer than scutellum, usually shorter than scutellum; (2) absent, claval apices concealed by scutellum; (3) absent, claval apices not concealed by scutellum. This coding is derived from Du *et al.*, 2016.
- [25] Areolate hemelytra: (0) no; (1) yes. This coding is derived from Henry, 1997.
- [26] Hemelytral membrane texture: (0) not aerolate; (1) areolate (at least in part). This coding is derived from Cassis *et al.*, 2023.
- [27] Costal fracture: (0) absent; (1) present, with corium-membrane boundary subvertical, formed a cuneus. This coding is derived from Cassis *et al.*, 2023.
- [28] Cuneus: (0) absent; (1) present. This coding is derived from Cassis *et al.*, 2023.
- [29] m-cu crossvein of hindwing: (0) present; (1) absent. This coding is derived from Schuh *et al.*, 2009.
- [30] Distal sector of R+M in hindwing: (0) not branching; (1) branching. This coding is derived from Cassis & Schuh, 2010.

### Legs

- [31] Femoral trichobothria: (0) absent; (1) present. This coding is derived from Schuh *et al.*, 2009.
- [32] Tibial appendix: (0) absent; (1) present. This coding is derived from Schuh *et al.*, 2009.
- [33] Number of tarsal segments of the hind leg: (0) four or three; (1) two; (2) one. This coding is derived from Henry, 1997.
- [34] Tarsal dilation: (0) tarsi of uniform diameter; (1) tarsi dilated distally. This coding is derived from Schuh *et al.*, 2009.
- [35] Pulvillus: (0) absent; (1) present and long; (2) short or reduced. This coding is modified from Henry, 1997.
- [36] Dorsal arolium: (0) reduced, as small bump; (1) absent.

[37] Articulation of metacoxae: (0) directed laterally; (1) directed posterolaterally. This coding is derived from Henry, 1997.

[38] Coxae shape: (0) conical elongated; (1) globose. This coding is derived from Cassis *et al.*, 2023.

### Abdomen

[39] Fusion of abdominal sterna: (0) all segments separate, with conjunctive membranes; (1) sterna 2–4 fused; (2) sterna 2–6 fused; (3) sterna 2–7 fused. This coding is derived from Henry, 1997.

[40] Sternite VII: (0) sternite VI, VII split by ovipositor; (1) sternite VII split by ovipositor; (2) entire.

[41] Abdominal trichobothrial pattern on each sternum: (0) absent; (1) 1–3 or more than 3.

[42] Parameres (symmetry): (0) symmetrical; (1) asymmetrical; (2) left paramere only; (3) obsolete. This coding is derived from Cassis *et al.*, 2023.

[43] Position of spiracles: (0) all ventral; (1) only II dorsal, remainder ventral; (2) II, III, and IV dorsal, V and VII ventral; (3) II, III, IV, V, and sometimes VI dorsal, VII dorsal or on ventral edge; (4) all dorsal. This coding is derived from Henry, 1997.

[44] Type of ovipositor: (0) lanceolate; (1) plate-like to reduced. This coding is derived from Schuh *et al.*, 2009.

[45] Spermatheca: (0) present; (1) absent or vestigial. This coding is derived from Henry, 1997.

[46] Dorsal laterotergites: (0) not fused with mediotergites; (1) fused with mediotergites. This coding is derived from Schuh *et al.*, 2009.

[47] Abdominal male segment VIII: (0) opening of pygophore dorsal or posterior, articulation dorsoventral; (1) opening of pygophore lateral, articulation anteroposterior. This coding is derived from Schuh *et al.*, 2009.

[48] Pygophore shape: (0) conical to suboval; (1) tubiform.

## List of taxa

| Species                                                     | Family                              |
|-------------------------------------------------------------|-------------------------------------|
| <i>Malcus</i> sp.                                           | Malcidae                            |
| <i>Triatoma</i> sp.                                         | Reduviidae                          |
| <i>Loricula elegantula</i> Bärensprung, 1858                | Microphysidae                       |
| <i>Trilaccus mimeticus</i> Chan & Cassis, 2019              | Miridae                             |
| <i>Inoma stysi</i> Cassis & Symonds, 2008                   | Tingidae                            |
| <i>Epimixia vulturna</i> Kirkaldy, 1908                     | Tingidae                            |
| <i>Onymocoris barberi</i> Drake & Slater, 1957              | Thaumastocoridae (Tahumastocorinae) |
| <i>Thaumastocoris peregrinus</i> Carpintero & Dellapé, 2006 | Thaumastocoridae (Tahumastocorinae) |
| <i>Discocoris dominicanus</i> Slater & Baranowski, 2000     | Thaumastocoridae (Xylastodorinae)   |
| <i>Discocoris drakei</i> Slater & Ashlock, 1959             | Thaumastocoridae (Xylastodorinae)   |
| <i>Popovocoris punctatus</i> nov. sp.                       |                                     |

## Character matrix

|                                  |                                                    |
|----------------------------------|----------------------------------------------------|
|                                  | 00000000001111111111222222222233333333334444444444 |
|                                  | 0123456789012345678901234567890123456789012345678  |
| <i>Malcus</i> sp.                | 120011101100100120000100100000100001-101210300000  |
| <i>Popovocoris punctatus</i>     | 1010001000000000?0000111010001000200111020????11?  |
| <i>Triatoma</i> sp.              | 1000000000111000111000002001111000000100100011000  |
| <i>Loricula elegantula</i>       | 1000000000101100200010000001101011000100100011100  |
| <i>Trilaccus mimeticus</i>       | 0001000100101100100001001001110110020000201011000  |
| <i>Inoma stysi</i>               | 1011000101000010001001213111010001101100200011000  |
| <i>Epimixia vulturna</i>         | 1011000101000010001001213111010001101100200011000  |
| <i>Discocoris dominicanus</i>    | 2011000000100000000001111100010001001110203011111  |
| <i>Discocoris drakei</i>         | 2011000000100000000001111100010001001110203011111  |
| <i>Thaumastocoris peregrinus</i> | 1011001000100000000001111100010011001010202011111  |
| <i>Onymocoris barberi</i>        | 1011001000100000000001111100010011001010202011111  |

## Supplementary References

Cassis, G. & Schuh, R. T. Systematic methods, fossils, and relationships within Heteroptera (Insecta). *Cladistics* **26**, 262–280 (2010).

Cassis, G., Monteith, G. B. & Postle, A. Hiding among the palms: the remarkable discovery of a new palm bug genus and species (Insecta: Heteroptera: Thaumastocoridae: Xylastodorinae) from remote Norfolk Island; systematics, natural history, palm specialism and biogeography. *Inverteb. Syst.* **37**, 702–740 (2023).

Du, Y. Y., Ren, D. & Zhang, W. Dehiscensicoridae fam. nov. (Insecta: Heteroptera: Pentatomomorpha) from the Upper Mesozoic of Northeast China. *J. Syst. Palaeontol.* **15**, 991–1013 (2016).

Henry, T. J. Phylogenetic analysis of family groups within the infraorder Pentatomomorpha (Hemiptera: Heteroptera), with emphasis on the Lygaeoidea. *Ann. Entomol. Soc. Am.* **90**, 275–301 (1997).

Schuh, R. T. & Slater, J. A. *True bugs of the world (Hemiptera: Heteroptera). Classification and Natural History*. 1–336 (Cornell University Press, 1995).

Schuh, R. T., Weirauch, C. & Wheeler, W. C. Phylogenetic relationships within the Cimicomorpha (Hemiptera: Heteroptera): a total-evidence analysis. *Syst. Entomol.* **34**, 15–48 (2009).
